# Supplementary material
Source: PubMed Central journal article supplement (PMC5394769)

## Online Supplemental Material

### Supplemental Table 1: Study inclusion and exclusion criteria

| Inclusion Criteria |                                                                                                                                                                                                                                                                                                                                                                                  |
|--------------------|----------------------------------------------------------------------------------------------------------------------------------------------------------------------------------------------------------------------------------------------------------------------------------------------------------------------------------------------------------------------------------|
| IC1                | Randomised, controlled clinical trial with either a cross-over or parallel group design                                                                                                                                                                                                                                                                                          |
| IC2                | Treatment period at least 2 weeks                                                                                                                                                                                                                                                                                                                                                |
| IC3                | Subjects in study populations can be free-living normocholesterolemic or hypercholesterolemic adults from the general population. Obese and overweight individuals or individuals with non-insulin dependent diabetes are acceptable                                                                                                                                             |
| IC4                | Oats are the only acceptable source of $\beta$ -glucan                                                                                                                                                                                                                                                                                                                           |
| IC5                | The amount of oat $\beta$ -glucan or oat soluble fibre/NSP consumed must be declared/measured. It must be at least 3 g/day (Oat soluble fibre was considered to be 92.5% $\beta$ -glucan)                                                                                                                                                                                        |
| IC6                | An appropriate control group with respect to the oat $\beta$ -glucan treatment group. Appropriate control food is similar to the treatment food, but does not contain oat $\beta$ -glucan or any soluble fibre, i.e. Is either a low fibre food product or a food product with insoluble fibre                                                                                   |
| IC7                | Measurements on blood lipids, i.e. blood total, LDL and HDL cholesterol. Information about cholesterol levels can be either primary or secondary outcome of the study                                                                                                                                                                                                            |
| IC8                | Enough information provided to calculate the magnitude of the effect : the mean baseline and after-treatment cholesterol levels and/or change in cholesterol levels                                                                                                                                                                                                              |
| IC9                | A formal assessment of diet and body weight changes during the trial                                                                                                                                                                                                                                                                                                             |
| Exclusion Criteria |                                                                                                                                                                                                                                                                                                                                                                                  |
| EC1                | The soluble fibre not specifically oat $\beta$ -glucan or a combination diet where the effect of oat $\beta$ -glucan cannot be isolated                                                                                                                                                                                                                                          |
| EC2                | Not sufficiently or appropriately controlled: only baseline data provided and no control group during the treatment period or an inappropriate control group, e.g. another soluble fibre                                                                                                                                                                                         |
| EC3                | Outcome measurement something else than blood lipids, e.g. postprandial lipidemia or glucose and insulin response, weight loss or bile acid synthesis                                                                                                                                                                                                                            |
| EC4                | Any uncontrolled significant changes during the trial known to affect blood lipid level, e.g. a significant difference in total fat or saturated fat intake between control and intervention groups, diets contain other soluble fibres than soluble NSP from oats, uncontrolled significant body weight change (Note: only important if interventions are affected differently) |
| EC5                | If the background diet is substantially different from the subjects's usual diet during the treatment period of the study, e.g. AHA step 1 and step 2 diet vs normal western diet, a lead-in period less than 2 weeks (Note: only important if does not apply to all interventions)                                                                                              |
| EC6                | Treatment period less than 2 weeks                                                                                                                                                                                                                                                                                                                                               |
| EC7                | Insufficient information to estimate the magnitude of the effect: no measure or estimate of soluble fibre or oat $\beta$ -glucan intake or limited amount of information on the outcome measures                                                                                                                                                                                 |
| EC8                | Non-systematic review articles, editorials, commentary (secondary information)                                                                                                                                                                                                                                                                                                   |
| EC9                | Treatment period only 2 weeks, and no wash-out period in cross-over study design                                                                                                                                                                                                                                                                                                 |
| EC10               | Entirely irrelevant study in relation to the diet and health relationship under consideration                                                                                                                                                                                                                                                                                    |
| EC11               | A duplicate publication: same study population as in one of the studies already included as evidence or pilot study for a bigger study included as evidence                                                                                                                                                                                                                      |
| EC12               | The daily intake of oat $\beta$ -glucan less than 3 g/day                                                                                                                                                                                                                                                                                                                        |
| EC13               | Children as a study population                                                                                                                                                                                                                                                                                                                                                   |
| EC14               | Studies with low molecular weight (<100 kDa)                                                                                                                                                                                                                                                                                                                                     |

## Supplemental Table 2: Study quality assessment questions

|            |                                                                                                          |
|------------|----------------------------------------------------------------------------------------------------------|
| <b>Q1</b>  | Power calculations performed                                                                             |
| <b>Q2</b>  | Baseline characteristics of subjects reported                                                            |
| <b>Q3</b>  | Subjects inclusion and exclusion criteria specified                                                      |
| <b>Q4</b>  | Information on background dietary habits provided                                                        |
| <b>Q5</b>  | Information on physical activity provided                                                                |
| <b>Q6</b>  | Information on smoking/alcohol drinking provided                                                         |
| <b>Q7</b>  | Information on medication use provided                                                                   |
| <b>Q8</b>  | Information on other risk factors provided                                                               |
| <b>Q9</b>  | Randomisation (Were subjects randomised to intervention?)                                                |
| <b>Q9a</b> | Random sequence generation (was allocation to intervention random i.e. not systematic such as ABABABAB?) |
| <b>Q9b</b> | Treatment allocation concealed (Trialists unable to manipulate randomised sequence)                      |
| <b>Q10</b> | Control and intervention groups comparable at baseline for relevant risk factors/outcome variables       |
| <b>Q11</b> | Blinding of subjects                                                                                     |
| <b>Q12</b> | Blinding of care givers                                                                                  |
| <b>Q13</b> | Blinding of outcome assessors                                                                            |
| <b>Q14</b> | Compliance of subjects with intervention reported                                                        |
| <b>Q15</b> | Duration of interventions greater than 2 weeks                                                           |
| <b>Q16</b> | Point estimates and variability of main outcome variable reported                                        |
| <b>Q17</b> | Surrogate markers of the claimed effect validated analytically (e.g. measuring blood cholesterol)        |
| <b>Q18</b> | Surrogate markers of the claimed effect validated biologically (e.g. change in cholesterol)              |
| <b>Q19</b> | Analyses include an intention to treat analysis                                                          |
| <b>Q20</b> | Adjustment for potential confounders performed                                                           |

## Supplemental Methods: Formulae for calculation of estimates of treatment difference and variances and covariances

### a. Parallel group studies

Let  $y_{ijkl}$  be the cholesterol level for subject  $l$  ( $l = 1, \dots, n_{ijk}$ ) at time  $k$  ( $k = b$  for baseline and  $e$  for end-of-trial) on diet  $j$  ( $j = c$  for control and  $t$  for oat  $\beta$ -glucan) in trial  $i$  ( $i = 1, \dots, r$ ). The cholesterol level is assumed to be normally distributed, so that

$$y_{ijkl} \sim N(\mu_{ijk}, \sigma_{ijk}^2)$$

Mean cholesterol levels for each time, diet arm and trial are estimated by

$$\bar{y}_{ijk.} = \frac{\sum_l y_{ijkl}}{n_{ijk}},$$

and these estimates are assumed to be normally distributed, so that

$$\bar{y}_{ijk.} \sim N\left(\mu_{ijk}, \frac{\sigma_{ijk}^2}{n_{ijk}}\right).$$

Let  $\psi_{ie} = \mu_{ite} - \mu_{ice}$  represent the difference in the mean cholesterol level at the end of the trial between oat  $\beta$ -glucan and control for study  $i$ . The estimate of  $\psi_{ie}$  is given by  $\bar{y}_{ite.} - \bar{y}_{ice.}$ , which has variance

$$V(\bar{y}_{ite.} - \bar{y}_{ice.}) = V(\bar{y}_{ite.}) + V(\bar{y}_{ice.}) = \frac{\sigma_{ite}^2}{n_{ite}} + \frac{\sigma_{ice}^2}{n_{ice}} \quad (1)$$

Let  $\phi_{ij} = \mu_{ije} - \mu_{ijb}$  represent the change in the mean cholesterol level from baseline for diet  $j$  in study  $i$ . The estimate of  $\phi_{ij}$  is given by  $\bar{y}_{ije.} - \bar{y}_{ijb.}$ , which has variance

$$V(\bar{y}_{ije.} - \bar{y}_{ijb.}) = \frac{\sigma_{ije}^2}{n_{ije}} + \frac{\sigma_{ijb}^2}{n_{ijb}} - 2 \frac{q_{ijejb}}{n_{ije}n_{ijb}} \rho_{ijejb} \sigma_{ije} \sigma_{ijb} \quad (2)$$

where  $q_{ijejb}$  is the number of subjects with observations at both times  $b$  and  $e$ , and  $\rho_{ijejb}$  is the correlation coefficient between times  $b$  and  $e$  for subjects on diet  $j$  in study  $i$ .

Let  $\theta_i = \phi_{it} - \phi_{ic} = (\mu_{ite} - \mu_{itb}) - (\mu_{ipe} - \mu_{ipb})$ . This represents the difference in the change from baseline between the oat  $\beta$ -glucan diet and the control diet. The estimate of  $\theta_i$  is given by

$(\bar{y}_{ite.} - \bar{y}_{itb.}) - (\bar{y}_{ice.} - \bar{y}_{icb.})$ , which has variance

$$V\left\{(\bar{y}_{ite.} - \bar{y}_{itb.}) - (\bar{y}_{ice.} - \bar{y}_{icb.})\right\} = \frac{\sigma_{ite}^2}{n_{ite}} + \frac{\sigma_{itb}^2}{n_{itb}} - 2 \frac{q_{itetb}}{n_{ite}n_{itb}} \rho_{itetb} \sigma_{ite} \sigma_{itb} + \frac{\sigma_{ice}^2}{n_{ice}} + \frac{\sigma_{icb}^2}{n_{icb}} - 2 \frac{q_{icecb}}{n_{ice}n_{icb}} \rho_{icecb} \sigma_{ice} \sigma_{icb} \quad (3)$$

For trials which include more than one dose of oat  $\beta$ -glucan, the covariance between the estimates of the effect of each dose compared with the control diet is required.

$$\text{Cov}\left(\left(\bar{y}_{ite.} - \bar{y}_{ice.}\right), \left(\bar{y}_{ite.} - \bar{y}_{ice.}\right)\right) = V\left(\bar{y}_{ice.}\right) = \frac{\sigma_{ice}^2}{n_{ice}} \quad (4)$$

$$\begin{aligned} \text{Cov}\left[\left\{\left(\bar{y}_{ise.} - \bar{y}_{isb.}\right) - \left(\bar{y}_{ice.} - \bar{y}_{icb.}\right)\right\}, \left\{\left(\bar{y}_{ite.} - \bar{y}_{itb.}\right) - \left(\bar{y}_{ice.} - \bar{y}_{icb.}\right)\right\}\right] &= V\left(\bar{y}_{ice.} - \bar{y}_{icb.}\right) \\ &= \frac{\sigma_{ice}^2}{n_{ice}} + \frac{\sigma_{icb}^2}{n_{icb}} - 2 \frac{q_{icecb}}{n_{ice}n_{icb}} \rho_{icecb} \sigma_{ice} \sigma_{icb} \end{aligned} \quad (5)$$

Trials may provide estimates,  $s_{ijk}$ , of the standard deviations  $\sigma_{ijk}$  of the cholesterol values for each diet at each time point. In this case the variance in formula (1) can be calculated. Some trials provide estimates of the variances given in formulae (2) and (3).

#### b. Cross-over studies

Let  $\psi_{ie} = \mu_{ite} - \mu_{ice}$  represent the difference in the mean cholesterol level at the end of the trial between oat  $\beta$ -glucan and control for study  $i$ . The estimate of  $\psi_{ie}$  is given by  $\bar{y}_{ite.} - \bar{y}_{ice.}$ , which has variance

$$V\left(\bar{y}_{ite.} - \bar{y}_{ice.}\right) = \frac{\sigma_{ite}^2}{n_{ite}} + \frac{\sigma_{ice}^2}{n_{ice}} - 2 \frac{q_{itece}}{n_{ite}n_{ice}} \rho_{itece} \sigma_{ite} \sigma_{ice} \quad (6)$$

where  $q_{itece}$  is the number of subjects with observations at end of treatment periods in both the oat  $\beta$ -glucan and control periods, and  $\rho_{itece}$  is the correlation coefficient between the end of treatment periods times in both the oat  $\beta$ -glucan and control periods in study  $i$ .

Let  $\phi_{ij} = \mu_{ije} - \mu_{ijb}$  represent the change in the mean cholesterol level from baseline for diet  $j$  in study  $i$ . The estimate of  $\phi_{ij}$  is given by  $\bar{y}_{ije.} - \bar{y}_{ijb.}$ , which has variance

$$V\left(\bar{y}_{ije.} - \bar{y}_{ijb.}\right) = \frac{\sigma_{ije}^2}{n_{ije}} + \frac{\sigma_{ijb}^2}{n_{ijb}} - 2 \frac{q_{ijejb}}{n_{ije}n_{ijb}} \rho_{ijejb} \sigma_{ije} \sigma_{ijb}$$

which is formula (2) above.

Let  $\theta_i = \phi_{it} - \phi_{ip} = (\mu_{ite} - \mu_{itb}) - (\mu_{ipe} - \mu_{ipb})$ . This represents the difference in the change from baseline between the oat  $\beta$ -glucan diet and the control diet. The estimate of  $\theta_i$  is given by

$$\left(\bar{y}_{ite.} - \bar{y}_{itb.}\right) - \left(\bar{y}_{ipe.} - \bar{y}_{ipb.}\right), \text{ which has variance}$$

$$\begin{aligned}
& V \left\{ (\bar{y}_{ite.} - \bar{y}_{itb.}) - (\bar{y}_{ice.} - \bar{y}_{icb.}) \right\} = \\
& \frac{\sigma_{ite}^2}{n_{ite}} + \frac{\sigma_{itb}^2}{n_{itb}} - 2 \frac{q_{itetb}}{n_{ite}n_{itb}} \rho_{itetb} \sigma_{ite} \sigma_{itb} + \frac{\sigma_{ice}^2}{n_{ice}} + \frac{\sigma_{icb}^2}{n_{icb}} - 2 \frac{q_{icecb}}{n_{ice}n_{icb}} \rho_{icecb} \sigma_{ice} \sigma_{icb} \\
& - 2 \frac{q_{itece}}{n_{ite}n_{ice}} \rho_{itece} \sigma_{ite} \sigma_{ice} + 2 \frac{q_{itecb}}{n_{ite}n_{icb}} \rho_{itecb} \sigma_{ite} \sigma_{icb} + 2 \frac{q_{itbce}}{n_{itb}n_{ice}} \rho_{itbce} \sigma_{itb} \sigma_{ice} - 2 \frac{q_{itbcb}}{n_{itb}n_{icb}} \rho_{itbcb} \sigma_{itb} \sigma_{icb}
\end{aligned}
\tag{7}$$

Trials may provide estimates of the variances given in formulae (2), (6) and (7).

**Supplemental Table 3: Quality scores for included studies**

| First Author     | Q1 | Q2 | Q3 | Q4 | Q5 | Q6 | Q7 | Q8 | Q9 | Q9a | Q9b | Q10 | Q11 | Q12 | Q13 | Q14 | Q15 | Q16 | Q17 | Q18 | Q19 | Q20 |
|------------------|----|----|----|----|----|----|----|----|----|-----|-----|-----|-----|-----|-----|-----|-----|-----|-----|-----|-----|-----|
| Abrahamsson (38) | 4  | 1  | 3  | 1  | 3  | 3  | 3  | 1  | 1  | 4   | 4   | 5   | 4   | 4   | 4   | 1   | 1   | 1   | 1   | 1   | 2   | 5   |
| Amundsen (39)    | 1  | 1  | 1  | 1  | 3  | 2  | 1  | 3  | 1  | 4   | 4   | 5   | 1   | 3   | 3   | 1   | 1   | 1   | 1   | 1   | 3   | 5   |
| Anderson (25)    | 4  | 1  | 1  | 1  | 3  | 3  | 2  | 2  | 1  | 4   | 4   | 4   | 4   | 4   | 4   | 1   | 1   | 1   | 1   | 1   | 4   | 4   |
| Beck (16)        | 1  | 1  | 2  | 1  | 1  | 2  | 3  | 3  | 1  | 1   | 1   | 1   | 1   | 3   | 4   | 1   | 1   | 1   | 1   | 1   | 3   | 1   |
| Berg (26)        | 4  | 1  | 2  | 3  | 2  | 3  | 2  | 2  | 1  | 4   | 4   | 2   | 3   | 4   | 4   | 1   | 1   | 1   | 1   | 1   | 1   | 3   |
| Braaten (40)     | 4  | 1  | 1  | 1  | 3  | 2  | 3  | 2  | 1  | 4   | 4   | 5   | 2   | 3   | 4   | 1   | 1   | 1   | 1   | 1   | 3   | 5   |
| Charlton (17)    | 1  | 1  | 1  | 1  | 1  | 2  | 2  | 3  | 1  | 1   | 4   | 1   | 1   | 3   | 4   | 1   | 1   | 1   | 1   | 1   | 1   | 1   |
| Chen (27)        | 4  | 1  | 1  | 1  | 2  | 1  | 2  | 1  | 1  | 1   | 1   | 1   | 3   | 1   | 1   | 1   | 1   | 1   | 1   | 1   | 1   | 2   |
| Davidson (28)    | 1  | 2  | 1  | 1  | 3  | 3  | 2  | 2  | 1  | 4   | 4   | 1   | 3   | 3   | 4   | 2   | 1   | 1   | 1   | 1   | 3   | 1   |
| Davy (29)        | 4  | 1  | 1  | 1  | 1  | 2  | 2  | 2  | 1  | 4   | 4   | 1   | 3   | 4   | 1   | 1   | 1   | 1   | 1   | 1   | 1   | 1   |
| Donazzolo (up)   | 1  | 1  | 1  | 1  | 4  | 4  | 1  | 1  | 1  | 1   | 1   | 1   | 1   | 1   | 1   | 1   | 1   | 1   | 1   | 1   | 1   | 1   |
| Gerhardt (30)    | 4  | 1  | 1  | 1  | 1  | 2  | 1  | 1  | 1  | 4   | 4   | 1   | 1   | 1   | 1   | 1   | 1   | 1   | 1   | 1   | 3   | 2   |
| Kabir (23)       | 4  | 1  | 1  | 2  | 2  | 3  | 1  | 1  | 1  | 4   | 4   | 5   | 3   | 4   | 4   | 2   | 1   | 1   | 1   | 1   | 1   | 5   |
| Karmally (31)    | 4  | 1  | 1  | 1  | 2  | 2  | 2  | 2  | 1  | 4   | 4   | 1   | 3   | 3   | 4   | 1   | 1   | 1   | 1   | 1   | 4   | 1   |
| Kerckhoffs (41)  | 1  | 1  | 1  | 1  | 2  | 1  | 1  | 1  | 1  | 4   | 4   | 5   | 4   | 4   | 4   | 1   | 1   | 1   | 1   | 1   | 1   | 5   |
| Kestin (42)      | 4  | 1  | 1  | 1  | 2  | 2  | 3  | 2  | 1  | 4   | 4   | 5   | 1   | 4   | 4   | 2   | 1   | 1   | 1   | 1   | 3   | 5   |
| Kristensen (43)  | 4  | 1  | 3  | 1  | 2  | 2  | 1  | 3  | 1  | 4   | 4   | 1   | 1   | 1   | 1   | 1   | 1   | 1   | 1   | 1   | 5   | 5   |
| Liatis (32)      | 4  | 1  | 1  | 3  | 3  | 3  | 2  | 2  | 1  | 1   | 1   | 1   | 1   | 1   | 4   | 1   | 1   | 1   | 1   | 1   | 3   | 1   |
| Maki (24)        | 1  | 1  | 1  | 1  | 1  | 2  | 2  | 1  | 1  | 4   | 4   | 1   | 3   | 4   | 4   | 1   | 1   | 1   | 1   | 1   | 2   | 1   |
| Pick (44)        | 4  | 1  | 1  | 1  | 1  | 3  | 2  | 2  | 1  | 1   | 1   | 5   | 4   | 4   | 4   | 2   | 1   | 1   | 1   | 1   | 1   | 5   |
| Pins (33)        | 2  | 1  | 1  | 2  | 2  | 3  | 2  | 1  | 1  | 4   | 4   | 1   | 3   | 1   | 4   | 1   | 1   | 1   | 1   | 1   | 1   | 1   |
| Queenan (34)     | 4  | 1  | 1  | 2  | 2  | 2  | 2  | 1  | 1  | 4   | 4   | 1   | 2   | 4   | 4   | 3   | 1   | 1   | 1   | 1   | 3   | 1   |
| Saltzman (35)    | 4  | 1  | 1  | 1  | 2  | 2  | 2  | 1  | 1  | 4   | 4   | 1   | 3   | 3   | 4   | 2   | 1   | 1   | 1   | 1   | 1   | 1   |
| Theuwissen (45)  | 2  | 1  | 1  | 1  | 3  | 2  | 1  | 2  | 1  | 4   | 5   | 5   | 1   | 1   | 1   | 1   | 1   | 2   | 1   | 1   | 3   | 5   |
| Uusitupa (36)    | 4  | 1  | 1  | 1  | 3  | 2  | 1  | 1  | 1  | 4   | 1   | 1   | 1   | 3   | 4   | 1   | 1   | 1   | 1   | 1   | 3   | 1   |
| Whyte (46)       | 4  | 1  | 1  | 1  | 2  | 2  | 2  | 3  | 1  | 4   | 4   | 5   | 4   | 4   | 4   | 1   | 1   | 1   | 1   | 1   | 3   | 5   |
| Wolever (12)     | 1  | 1  | 1  | 1  | 3  | 1  | 1  | 1  | 1  | 1   | 1   | 1   | 1   | 1   | 1   | 1   | 1   | 1   | 1   | 1   | 1   | 1   |
| Zhang (37)       | 4  | 1  | 1  | 1  | 3  | 1  | 2  | 3  | 1  | 4   | 4   | 1   | 3   | 3   | 1   | 2   | 1   | 1   | 1   | 1   | 3   | 5   |

Key: 1 = Yes, 2 = Partially, 3 = No, 4 = unknown, 5 = Not applicable

**Supplemental Table 4: Meta-regressions for LDL- and total-cholesterol**

| <b>LDL-cholesterol</b>                            |                       |                  |                |                             |
|---------------------------------------------------|-----------------------|------------------|----------------|-----------------------------|
| <b>Effect</b>                                     | <b>Estimate</b>       | <b>Std Error</b> | <b>p-value</b> | <b>p-value (all levels)</b> |
| Dose                                              | 0.0035                | 0.0113           | 0.76           |                             |
| Duration                                          | 0.0049                | 0.0079           | 0.53           |                             |
| Baseline LDL                                      | -0.1092               | 0.0529           | 0.039          |                             |
| Baseline TC                                       | -0.0683               | 0.0383           | 0.074          |                             |
| Age                                               | -0.0070               | 0.0040           | 0.081          |                             |
| % male                                            | -0.0020               | 0.0011           | 0.054          |                             |
| Design (   vs X-over)                             | 0.0147                | 0.0516           | 0.78           |                             |
| Diet (low fat vs standard)                        | -0.0821               | 0.0772           | 0.29           | 0.56                        |
| Diet( restricted vs standard)                     | -0.0205               | 0.0745           | 0.78           |                             |
| Health (hyperchol vs healthy)                     | -0.0880               | 0.0502           | 0.079          | 0.015                       |
| Health(diabetic vs healthy)                       | -0.4185               | 0.1684           | 0.013          |                             |
| Q9a,b randomisation (yes vs rest)                 | 0.081                 | 0.053            | 0.13           |                             |
| Q11 blinding of subjects (yes vs rest)            | 0.063                 | 0.050            | 0.20           |                             |
| Q12 blinding of care givers (yes vs rest)         | 0.063                 | 0.049            | 0.20           |                             |
| Q13 blinding of outcome assessors (yes vs rest)   | 0.108                 | 0.048            | 0.024          |                             |
| Q14 reporting of subject compliance (yes vs rest) | 0.096                 | 0.071            | 0.18           |                             |
|                                                   |                       |                  |                |                             |
| <b>Total-cholesterol</b>                          |                       |                  |                |                             |
| <b>Effect</b>                                     | <b>Slope Estimate</b> | <b>Std Error</b> | <b>p-value</b> | <b>p-value (all levels)</b> |
| Dose                                              | -0.0081               | 0.0137           | 0.55           |                             |
| Duration                                          | -0.0034               | 0.0098           | 0.73           |                             |
| Baseline LDL                                      | -0.0055               | 0.0552           | 0.92           |                             |
| Baseline TC                                       | 0.0266                | 0.0464           | 0.57           |                             |
| Age                                               | -0.0002               | 0.0046           | 0.97           |                             |
| % male                                            | -0.0016               | 0.0012           | 0.21           |                             |
| Design (   vs X-over)                             | 0.0579                | 0.0629           | 0.36           |                             |
| Diet (low fat vs standard)                        | -0.0063               | 0.0855           | 0.94           | 0.84                        |
| Diet( restricted vs standard)                     | -0.0534               | 0.0916           | 0.56           |                             |
| Health (hyperchol vs healthy)                     | -0.0416               | 0.0530           | 0.43           | 0.016                       |
| Health(diabetic vs healthy)                       | -0.396                | 0.1380           | 0.004          |                             |
| Q9a,b randomisation (yes vs rest)                 | 0.113                 | 0.063            | 0.072          |                             |
| Q11 blinding of subjects (yes vs rest)            | 0.062                 | 0.060            | 0.30           |                             |
| Q12 blinding of care givers (yes vs rest)         | 0.067                 | 0.058            | 0.24           |                             |
| Q13 blinding of outcome assessors (yes vs rest)   | 0.128                 | 0.055            | 0.021          |                             |
| Q14 reporting of subject compliance (yes vs rest) | 0.100                 | 0.076            | 0.19           |                             |

**Supplemental Figure 1: LDL estimates by dose, duration, age, %male, baseline LDL- and total-cholesterol**

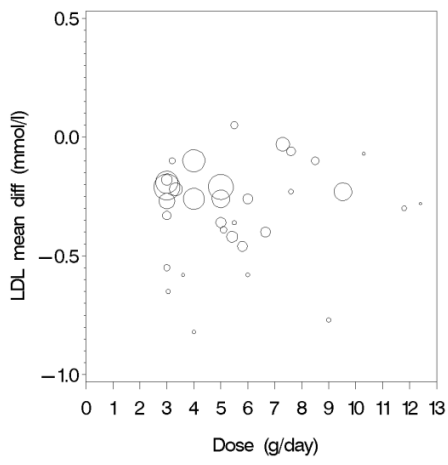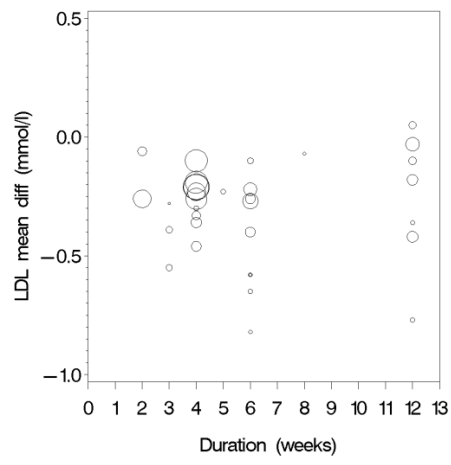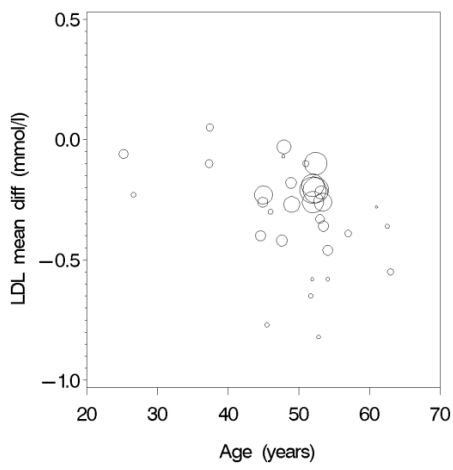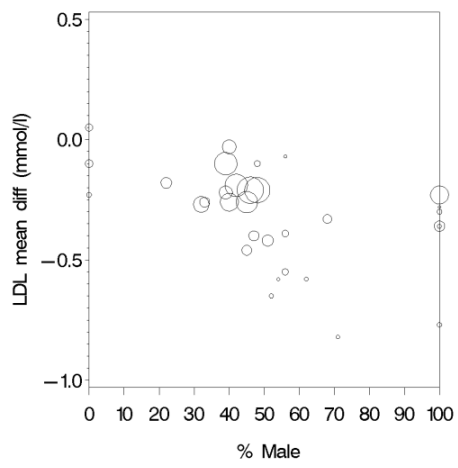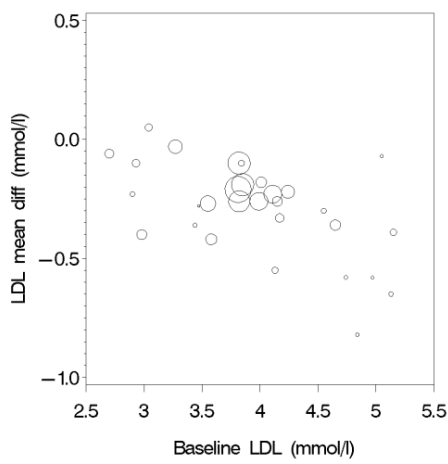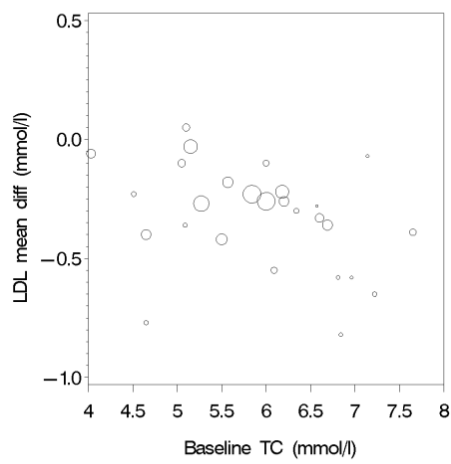

Supplement: 114.086108_ajcn086108SupplementaryData1.pdf [file 114.086108_ajcn086108SupplementaryData1.pdf]
